# Supplementary material
Source: Elsevier journal article supplement (https://www.sciencedirect.com/science/article/pii/S2173573518300644)
Supplement: mmc1 [file S2173573518300644:mmc1.xlsx]

## Sheet: Hoja1
	Tabla 1. Hospitales con publicaciones indexadas en PubMed
Posición	Hospital	Total originales	FI acumulado	FI medio	Total pub
1	Hospital Central de Asturias-IUOPA	49	169.15	3.19151	53
2	Clinica Universidad de Navarra	36	51.6	1.43333	36
3	Hospital Clinic Barcelona-IDIBAPS	22	105.59	4.2236	25
4	Hospital Universitario La Paz	21	39.447	1.71509	23
5	Hospital de Poniente-GENyO	14	34.33	2.45214	14
6	Hospital Lucus Augusti Lugo	9	20.194	2.52425	8
7	Hospital Universitario Salamanca	7	16.983	2.42614	7
8	Hospital Universitario Ramon y Cajal	7	13.95	1.74375	8
9	Hospital Universitario de Getafe	7	12.42	1.77429	7
10	Hospital Puerta de Hierro Majadahonda	7	10.638	0.967091	11
11	Hosp Santa Creu i Sant Pau, Barcelona	6	18.272	3.04533	6
12	Hospital Universitario Valencia	4	10.9	2.18	5
13	Hospital Universitario de Santiago	4	7.42	1.855	4
14	Hospital Clinico Universitario Granada	3	5.003	1.66767	3
15	Hospital Universitario Henares	3	4.276	1.42533	3
16	Hospital Clinico San Carlos Madrid	3	3.728	1.24267	3
17	Hosp Sos Espases, Palma de Mallorca	3	3	1	3
18	Hospital Universitario Rio Hortega	3	2.14	0.713333	3
19	Bellvitge Biomedical Research Institute	2	12.56	6.28	2
20	Hospital Universitario Virgen del Rocio, Sevilla	2	8.04	4.02	2
21	Hospital Vall D'Hebron	2	5.59	2.795	2
22	Hospital de Linares	2	5.04	2.52	2
23	Hospital de Basurto	2	4.318	1.43933	3
24	Complejo Hospitalario Navarra	2	3.56	1.78	2
25	Hospital Gregorio Marañon	2	3.355	1.11833	3
26	Hospital De Elda	1	3.54	3.54	1
27	Hospital Universitario A Coruña	1	3.256	3.256	1
28	Hospital Germans Trias	1	3.13	3.13	1
29	Fundacion Jimenez Diaz	1	2.64	1.32	2
30	Hospital Univerisitario de Alicante	1	2.602	2.602	1
31	Instituto Oncologico Gipuzkoa	1	1.926	1.926	1
32	Hospital Donosti	1	1.9	1.9	1
33	Hospital Universitario Rey Juan Carlos	1	1.844	1.844	1
34	Hospital de Vigo	1	1.787	1.787	1
35	Hospital Dr Pesset Valencia	1	1.608	1.608	1
36	Instituto Antoli-Candela	1	1.598	1.598	1
37	Hospital Sonsoles Avila	1	1.39	1.39	1
38	Clarós Clinic	1	1.19	1.19	1
39	Hospital Materno-Infantil Insular Canarias	1	1.16	1.16	1
40	Hospital 12 de Octubre	1	1.099	1.099	1
41	Hospital Alt Penedes	1	1.099	1.099	1
42	Hospital Universitario Reina Sofia	1	0.99	0.495	2
43	Hospital Universitario Burgos	1	0.722	0.722	1
44	Hospital La Princesa	1	0.61	0.61	1
45	Hospital El Escorial	1	0	0	1
46	Hospital de Fuenlabrada	0	1.186	1.186	1
47	Hospital Quiron Barcelona	0	1.18	1.18	1
48	Hospital Universitario Cruces	0	0	0	1
49	Hospital de Ciudad Real	0	0	0	1
50	Hospital Severo Ochoa	0	0	0	1

## Sheet: Hoja2
	Tabla 2. Hospitales que publican en Acta ORL Española
Posición	Hospital	Total originales	Total pub
1	Hospital Central de Asturias-IUOPA	19	30
2	Hospital Universitario Valencia	13	26
3	Complejo Hospitalario Insular Materno Infantil	9	11
4	Hospital Dr Pesset Valencia	7	9
5	Hosp Santa Creu i Sant Pau, Barcelona	6	11
6	Hospital Universitario Virgen del Rocio, Sevilla	5	13
7	Hospital General de Cataluña	5	5
8	Hospital Universitario A Coruña	4	6
9	Hospital Universitario Marqués de Valdecilla	4	5
10	Clinica Universidad de Navarra	3	6
11	Hospital Clínico Universitario Lozano Blesa	3	5
12	Hospital Universitario de Santiago	3	5
13	Hospital Universitario La Paz	3	5
14	Hospital Puerta de Hierro Majadahonda	3	4
15	Hospital Universitario Miguel Servet	3	4
16	Hospital Universitario Ramón y Cajal	3	4
17	Hospital de Fuenlabrada	3	3
18	Hospital de Poniente-GENyO	3	3
19	Hospital Clinic Barcelona-IDIBAPS	2	5
20	Hospital Universitario Rio Hortega	2	5
21	Bellvitge Biomedical Research Institute	2	4
22	Hospital Virgen de La Concha	2	4
23	Hospital Clinico Universitario Granada	2	3
24	Hospital Costa del Sol	2	2
25	Hospital Donosti	2	2
26	Hospital Infantil Universitario Niño Jesús	2	2
27	Hospital Vall D'Hebron	1	5
28	Hospital de Ciudad Real	1	3
29	Hospital Rafael Méndez	1	3
30	Hospital Sonsoles Avila	1	3
31	Hospital Univerisitario de Alicante	1	3
32	Hospital Clínico Universitario Virgen de la Victoria	1	2
33	Hospital de Getafe	1	2
34	Hospital de Vigo	1	2
35	Hospital del Mar Menor	1	2
36	Centro Médico Teknon	1	1
37	Complejo Hospitalario Universitario de La Coruña	1	1
38	Fundacion Jimenez Diaz	1	1
39	Hosp Sos Espases, Palma de Mallorca	1	1
40	Hospital de Basurto	1	1
41	Hospital de La Ribera	1	1
42	Hospital del Vinalopó	1	1
43	Hospital El Escorial	1	1
44	Hospital Francesc de Borja	1	1
45	Hospital Galdakao-Usansolo	1	1
46	Hospital General Universitario de Elche	1	1
47	Hospital Municipal de Badalona-BSA	1	1
48	Hospital San Camilo	1	1
49	Hospital Universitario Canarias	1	1
50	Hospital Universitario Fundación Alcorcón	1	1
51	Hospital Universitario Juan XIII	1	1
52	Hospital Xeral-Cíes	1	1
53	Institut Universtiari Dexeus	1	1
54	Instituto Internacional de Vías Nasolagrimales	1	1
55	Universidad de Zaragoza	1	1
56	Hospital Clínico Universitario de Valladolid	0	4
57	Hospital Parc Tauli, Sabadell	0	4
58	Hospital da Costa	0	3
59	Hospital Universitario Reina Sofia	0	3
60	Complejo Hospitalario Universitario de Badajoz	0	2
61	Hospital de Algeciras	0	2
62	Hospital de Viladecans	0	2
63	Hospital Gregorio Marañón	0	2
64	Hospital Punta de Europa	0	2
65	Hospital Universitario Nuestra Señora de la Candelaria	0	2
66	Hospital Universitario Puerto Real	0	2
67	Hospital Universitario Salamanca	0	2
68	Hospital Universitario Virgen Macarena	0	2
69	Complejo Hospitalario de Segovia	0	1
70	Complejo Hospitalario La Mancha Centro	0	1
71	Complejo Hospitalario Universitario	0	1
72	Complejo Hospitalario Universitario de Albacete	0	1
73	Cruces University Hospital	0	1
74	Hosp Univ Marques Valdecilla	0	1
75	Hospital 12 de Octubre	0	1
76	Hospital Arganda del Rey	0	1
77	Hospital Arnau de Vilanova	0	1
78	Hospital Comarcal Santiago Apóstol	0	1
79	Hospital de Gandia	0	1
80	Hospital de la Línea de la Concepción	0	1
81	Hospital de San Lorenzo	0	1
82	Hospital de Santa María de Lleida	0	1
83	Hospital General de Castellón	0	1
84	Hospital General de Fuerteventura	0	1
85	Hospital General de Gran Canaria Dr. Negrín	0	1
86	Hospital General de Requena	0	1
87	Hospital Infanta Leonor	0	1
88	Hospital Juan Ramón Jiménez	0	1
89	Hospital Moncloa	0	1
90	Hospital Plató	0	1
91	Hospital Ribera	0	1
92	Hospital Río Carrión	0	1
93	Hospital San Juan de Dios del Aljarafe	0	1
94	Hospital San Pedro	0	1
95	Hospital San Pedro de Alcántara	0	1
96	Hospital Santa Bárbara	0	1
97	Hospital Universitario Arnau de Vilanova	0	1
98	Hospital Universitario Burgos	0	1
99	Hospital Universitario Niño Jesús	0	1
100	Hospital Universitario Virgen de la Arrixaca	0	1
101	Hospital Virgen de la Luz	0	1
102	Hospital Virgen de la Victoria	0	1
103	Hospital Virgen del Puerto	0	1
